# Supplementary material for: The influence of Alpine soil properties on shallow movement hazards, investigated through factor analysis
Source: Copernicus journal article supplement (doi:10.5194/nhess-12-1845-2012), 2012-06-12
Supplement: Supplementary file 1 [file nhess-12-1845-2012-supplement.pdf]

1 **Supplement: land unit types and site characteristics for the soil profiles considered**

2 Vegetation codes 1: alpine grassland; 1a: alpine grassland invaded by larch; 2: coniferous forest; 3: alpine meadow with shrubs (*Juniperus communis*, *Salix* spp); 4: mixed  
3 broadleaved pioneer wood; 5:coppice; 5a: abandoned coppice with pioneer species invasion; 6: Mixed forest with conifers and broadleaves; 7: coniferous forest; 8: pasture; 9:  
4 meadow

5

| Profile ID | Northing (UTM) | Easting (UTM) | Land unit ID | Altitude (m asl) | Slope (%) | Vegetation cover | Synthetic land unit description                                                                                                    | Soil taxonomy |                |                      | Morphology and lithology                     |
|------------|----------------|---------------|--------------|------------------|-----------|------------------|------------------------------------------------------------------------------------------------------------------------------------|---------------|----------------|----------------------|----------------------------------------------|
| 1          | 5076828        | 386422        | 33224        | 2184             | 23        | 1                | Areas with limited slope, with morainic substrate, mixed lithology, herbaceous cover                                               | Typic         | Udorthent      | sandy, mixed, frigid | Mixed glacial deposits, lateral morain       |
| 2          | 5076093        | 385123        | 51223        | 2040             | 38        | 2                | Areas with intermediate slope, interested by large quiescent landslides; mixed morainic substratum, prevalence of coniferous cover | Typic         | Cryorthent     | sandy, mixed         | Mixed glacial deposits, lateral morain       |
| 3          | 5074264        | 385429        | 53112        | 1723             | 20        | 1                | Areas with limited slope, with colluvial deposits and unstable incoherent deposits, morainic substrate with mixed lithology        | Typic         | Udorthent      | loamy, mixed, mesic  | Morainic deposits on serpentinites           |
| 4          | 5075243        | 384917        | 51212        | 1959             | 25        | 2                | Areas with limited slope, with prevailing coniferous cover, morainic substrate with mixed lithology and rock outcrops              | Typic         | Cryopsamments, | mixed                | Mixed colluvial deposits, with serpentinites |

|    |         |        |       |      |    |   |                                                                                                                                       |                                               |        |                                             |
|----|---------|--------|-------|------|----|---|---------------------------------------------------------------------------------------------------------------------------------------|-----------------------------------------------|--------|---------------------------------------------|
| 5  | 5075724 | 385815 | 53222 | 1923 | 20 | 1 | Slopes with incoherent detritic deposits, with prevailing herbaceous cover; morainic substrate with mixed lithology                   | Typic Dystrudept mixed, frigid                | sandy, | Mixed morainic deposits, with serpentinites |
| 6  | 5075524 | 383102 | 33224 | 2390 | 50 | 1 | Areas with limited slope, with morainic substrate, mixed lithology, herbaceous cover                                                  | Typic Cryorthent mixed                        | sandy, | Mixed deposits                              |
| 7  | 5075064 | 383435 | 51212 | 2235 | 15 | 3 | Areas with limited slope, with prevailing coniferous cover, morainic substrate with mixed lithology and rock outcrops                 | Typic Cryopsamment, mixed                     |        | Moraine                                     |
| 8  | 5071662 | 386287 | 51112 | 1838 | 10 | 2 | Areas with limited slope, with morainic substrate, mixed lithology, coniferous vegetation                                             | Typic Cryorthent mixed                        | sandy, | Mixed orainic deposits with serpentinites   |
| 9  | 5070270 | 382310 | 51123 | 1560 | 15 | 2 | Areas with intermediate slope, with alluvial fans and colluvium, morainic substrate with mixed lithology, prevailing coniferous cover | Typic Udipsamment, mixed (calcareous), mesic  |        | Mixed deposits with serpentinites           |
| 10 | 5068954 | 382853 | 51112 | 1260 | 40 | 2 | Areas with limited slope, with morainic substrate, mixed lithology, coniferous vegetation                                             | Typic Ustipsamment, mixed (calcareous), mesic |        | Morainic deposits on calcschist             |
| 11 | 5072228 | 384870 | 31234 | 2220 | 65 | 2 | Areas with considerable slopes, with mixed lithology, often with landslides, with prevailing coniferous cover                         | Typic Cryopsamment, mixed (calcareous)        |        | Gravitative deposits on calcschist          |
| 12 | 5070390 | 386307 | 52112 | 1435 | 25 | 1 | Areas with limited slope, developing on moraine with mixed lithology, prevalence of broadleaves cover                                 | Typic Udorthent mixed (calcareous), mesic     | sandy, | Glacial deposits with prevalence of gravel  |
| 13 | 5071763 | 382632 | 31124 | 1350 | 65 | 4 | Areas with considerable slopes, with mixed lithology,                                                                                 | Typic Udorthent                               | sandy, | Gravitative deposits on                     |

|    |         |        |       |      |    |   |                                                                                                                                                                                                                         |                                                  |                                        |
|----|---------|--------|-------|------|----|---|-------------------------------------------------------------------------------------------------------------------------------------------------------------------------------------------------------------------------|--------------------------------------------------|----------------------------------------|
|    |         |        |       |      |    |   | often with landslides, with prevailing coniferous cover                                                                                                                                                                 | mixed, mesic                                     | calcschist                             |
| 14 | 5076801 | 383642 | 63224 | 2358 | 65 | 1 | Areas with considerable slopes, with detritic fans and abundant rock outcrops; mixed lithology; prevailing herbaceous cover                                                                                             | Typic Cryopsamment, mixed                        | Glacial deposits                       |
| 15 | 5077188 | 385710 | 53214 | 2300 | 60 | 1 | Slopes with alluvial fans and detritic deposits, and rock outcrops; herbaceous cover; morainic substrate with mixed lithology                                                                                           | Typic Cryopsamment, mixed                        | Mixed morainic deposits                |
| 16 | 5069342 | 382515 | 32124 | 1450 | 65 | 5 | High slopes on alluvial fans or detritus, with sporadic presence of active landslides, mixed lithology, prevailing broadleaves cover                                                                                    | Typic Udipsamment, mixed<br>(calcareous), mesic  | Gravitational deposits,<br>calcschists |
| 17 | 5067584 | 385073 | 53112 | 670  | 25 | 4 | Areas with limited slope, with colluvial deposits and unstable incoherent deposits, morainic substrate with mixed lithology                                                                                             | Typic Xeropsamment, mixed<br>(calcareous), mesic | Morainic deposits, calcareous          |
| 18 | 5065478 | 377795 | 55034 | 884  | 16 | 4 | Slopes interested by incipient or quiescent mass movements, active taluses, presence of mud flows, debris flow and fractured rock outcrops, diffused landslides. Prevalence of mixed coniferous and broadleaves forest. | Typic Xeropsamments,<br>mixed, mesic             | Mixed deposits with<br>micaschists     |
| 19 | 5065947 | 377216 | 32032 | 708  | 45 | 4 | Alluvial fans affected by the year 2000 flood, presence of quarries; presence of areas affected by debris flows and ex-agricultural terraced slopes; Heterogeneous                                                      | Typic Xeropsamment,<br>mixed, mesic              | Mixed colluvium                        |

vegetation cover, with prevalence of deciduous species

|    |         |        |       |     |    |    |                                                                                                                                                                                                                                                       |                    |                   |                                                         |               |
|----|---------|--------|-------|-----|----|----|-------------------------------------------------------------------------------------------------------------------------------------------------------------------------------------------------------------------------------------------------------|--------------------|-------------------|---------------------------------------------------------|---------------|
| 20 | 5065717 | 380920 | 35033 | 925 | 43 | 4  | Slope sectors with abundance of boulders and fractured outcrops; area affected by both quiescent and active mass movements the latter on clear cut corridors); taluses with bare soil; frequent debris flow episodes and flooding; mixed forest cover | Typic mixed, mesic | Xerorthent sandy, | Colluvium, schists                                      | prevalence of |
| 21 | 5065494 | 380228 | 35033 | 687 | 37 | 4  | Slope sectors with abundance of boulders and fractured outcrops; area affected by both quiescent and active mass movements the latter on clear cut corridors); taluses with bare soil; frequent debris flow episodes and flooding; mixed forest cover | Typic mixed, mesic | Xeropsamment,     | Colluvium, schists                                      | prevalence of |
| 22 | 5064683 | 382394 | 35033 | 981 | 47 | 6  | Slope sectors with abundance of boulders and fractured outcrops; area affected by both quiescent and active mass movements the latter on clear cut corridors); taluses with bare soil; frequent debris flow episodes and flooding; mixed forest cover | Typic mixed, mesic | Xeropsamment,     | Gravitative deposits                                    |               |
| 23 | 5065870 | 381801 | 55032 | 828 | 22 | 6  | Areas with limited slope; presence of active alluvial fans, subject to debris flow phenomena. Prevalence of mixed forest (broadleaves and conifers)                                                                                                   | Typic mixed, mesic | Xeropsamment,     | Morainic deposits, prevalence of prasinites and schists |               |
| 24 | 5066400 | 383807 | 34031 | 623 | 21 | 5a | Alluvial plain affected by the year 2000 flood                                                                                                                                                                                                        | Typic mixed, mesic | Xeropsamment,     | Mixed gravitative deposits, prevalence of calcschists   |               |

|    |         |        |       |     |    |   |                                                                                                                                                                                                                       |       |                    |                                                  |
|----|---------|--------|-------|-----|----|---|-----------------------------------------------------------------------------------------------------------------------------------------------------------------------------------------------------------------------|-------|--------------------|--------------------------------------------------|
| 25 | 5063873 | 383763 | 55023 | 990 | 30 | 6 | Sectors with high slope, with active alluvial fans or taluses; presence of debris flow phenomena; prevalence of mixed forest                                                                                          | Typic | Xeropsamment,      | Mixed morainic deposits                          |
| 26 | 5065230 | 384353 | 55034 | 959 | 50 | 2 | Slopes affected by incipient or quiescent mass movements, active taluses, presence of mud flows, debris flow and fractured rock outcrops, diffused landslides. Prevalence of mixed coniferous and broadleaves forest. | Typic | Xeropsamment,      | Morainic deposits, prevalence of calcschists     |
| 27 | 5066174 | 387705 | 55032 | 630 | 32 | 6 | Slopes affected by active mass movements, active taluses, presence of mud flows, debris flow and fractured rock outcrops, diffused landslides. Prevalence of mixed coniferous and broadleaves forest.                 | Typic | Xeropsamment,      | Mixed morainic deposits                          |
| 28 | 5065809 | 390277 | 55034 | 650 | 50 | 5 | Slopes affected by incipient or quiescent mass movements, active taluses, presence of mud flows, debris flow and fractured rock outcrops, diffused landslides. Prevalence of mixed coniferous and broadleaves forest. | Typic | Haploxerept sandy, | Morainic deposits, prevalence of calcschists     |
| 29 | 5066248 | 390277 | 25034 | 930 | 40 | 7 | Slope sectors partially affected by fans and colluviums; active landslides and clear-cut areas; mixed forest, where present                                                                                           | Typic | Haploxerept sandy, | Colluvium, prevalence of calcschists             |
| 30 | 5066138 | 389387 | 55034 | 880 | 40 | 6 | Slopes affected by incipient or quiescent mass movements, active taluses, presence of mud flows,                                                                                                                      | Typic | Xerorthent sandy,  | Mixed morainic deposits, abundance of ophiolites |

debris flow and fractured rock outcrops, diffused landslides. Prevalence of mixed coniferous and broadleaves forest.

|    |         |         |       |      |    |    |                                                                                                                                                     |                                              |                                                          |
|----|---------|---------|-------|------|----|----|-----------------------------------------------------------------------------------------------------------------------------------------------------|----------------------------------------------|----------------------------------------------------------|
| 31 | 5065855 | 387630  | 25034 | 950  | 55 | 6  | Slope sectors partially affected by fans and colluviums; active landslides and clear-cut areas; mixed forest, where present                         | Typic Haploxerept coarse-loamy, mixed, mesic | Mixed morainic deposits                                  |
| 32 | 5066124 | 5066124 | 14031 | 520  | 4  | 2  | Flat areas periodically subject to flooding; high settling density; presence of quarry deposits                                                     | Typic Xerorthent coarse-loamy, mixed, mesic  | Mixed alluvial deposits                                  |
| 33 | 5066726 | 382644  | 33031 | 500  | 1  | 8  | Alluvial fans with material deriving from the year 200 flood; areas with debris flow deposits; sub-flat portions of mixed discontinuous forest      | Typic Xeropsamment, mixed, mesic             | Alluvial deposits, prevalence of calcshists              |
| 34 | 5065703 | 378928  | 14032 | 550  | 2  | 9  | Alluvial fans with agricultural land use                                                                                                            | Typic Haploxerept sandy, mixed, mesic        | Colluviums, mixed deposits                               |
| 35 | 5066473 | 390524  | 34032 | 500  | 15 | 9  | Sub-flat areas subject to flooding or gentle slopes with dominant agricultural use                                                                  | Typic Haploxerept sandy, mixed, mesic        | Colluviums, mixed deposits with prevalence of ophiolites |
| 36 | 5085315 | 383922  | 33214 | 2154 | 50 | 8  | Vaste portions of the upper part of slopes on the right valley side, with South exposition, mixed detritus cover and herbaceous vegetation          | Typic Cryorthent, skeletal, mixed            | Mixed gravitative deposits                               |
| 37 | 5082991 | 380453  | 53224 | 2018 | 40 | 1a | Slopes on the right valley side, with considerable slopes, with mixed glacial deposits and high presence of surface skeleton, with herbaceous cover | Typic Cryorthent, skeletal, mixed            | Mixed morainic deposits                                  |

|    |         |        |       |      |    |    |                                                                                                                |       |                        |        |                         |
|----|---------|--------|-------|------|----|----|----------------------------------------------------------------------------------------------------------------|-------|------------------------|--------|-------------------------|
| 38 | 5086103 | 386055 | 46234 | 1914 | 25 | 1a | Areas with limited slopes, on acid rock substrate, with conifer vegetation interrupted by avalanche corridors  | Typic | Cryorthent             | sandy- | Gneiss and micaschists  |
|    |         |        |       |      |    |    |                                                                                                                |       | skeletal, mixed        |        |                         |
| 39 | 5086376 | 385738 | 43234 | 1998 | 15 | 1  | Pastures with medium to high slope, South-facing, with mixed detritic substrate and presence of rock outcrops. | Typic | Cryorthent             | sandy, | Mixed morainic deposits |
|    |         |        |       |      |    |    |                                                                                                                |       | mixed, non acid        |        |                         |
| 40 | 5081192 | 378163 | 41134 | 1495 | 50 | 7  | North-facing sloping areas, with gneiss and micaschist substrate, coniferous cover                             | Typic | Udorthent,             | sandy- | Micaschist and gneiss   |
|    |         |        |       |      |    |    |                                                                                                                |       | skeletal, mixed, mesic |        |                         |
| 41 | 5076284 | 371645 | 34122 | 1005 | 35 | 4  | Footslopes with colluvial material, medium slope, agricultural with high anthropogenic influence               | Typic | Udorthent,             | sandy, | Mixed morainic deposits |
|    |         |        |       |      |    |    |                                                                                                                |       | mixed, non acid,       |        |                         |

---
